1 **Hosting sea anemones at the Perhentian reefs of Malaysia: population descriptives and associations with**  
2 **live coral cover.**

3

4 Melissa Versteeg<sup>1\*</sup>, Alanah Campbell<sup>1</sup>, and Hidayah Halid<sup>1</sup>

5

6 <sup>1</sup> Perhentian Marine Research Station, No.125 Kampung Nelayan, Pulau Perhentian, 22300 Besut Terengganu,  
7 Malaysia; Email: mversteeg5@gmail.com (\*corresponding author)

8

9 **Abstract.** Around the Perhentian Islands, coral reefs have been undergoing degradation, as is reported by coral  
10 reef monitoring programmes. Current coral reef surveys around the Perhentian Islands do not specifically  
11 monitor hosting sea anemone populations, nor do they include investigation of how sea anemone abundance  
12 correlates to live coral cover on reef sites. As sea anemones can compete with corals for suitable substrate,  
13 nutrients, and light availability, the current study was designed to explore hosting sea anemone abundance and  
14 distribution patterns around the Perhentian Islands, as well as assess the presence of significant correlations  
15 between sea anemone abundance and live coral cover. Two sites with hosting sea anemone populations were  
16 assessed, and data was collected for sea anemone species, formation type, hosting status, and resident  
17 Amphiprion species. Additionally, live coral cover estimates were calculated and tested for associations between  
18 coral and sea anemone abundance. In total, 403 hosting sea anemone formations were analysed. Statistical  
19 analyses revealed that at the research site Village Reef, sea anemones that were actively hosting were larger, and  
20 more often encountered in clustered formations. In addition, sea anemone cover was significantly negatively  
21 correlated to live coral cover. At research site Teluk Keke, actively hosting sea anemones were also larger, but  
22 no other tests revealed significant results at this site. The current study offers a first population analysis of  
23 hosting sea anemone assemblages around the Perhentian Islands and provides a preliminary exploration of the  
24 associations between hosting sea anemone presence and live coral cover on these reefs.

25

26 **Key words.** coral reefs, anemones, *Actiniaria*, *Heteractis*, hosting status, formations

27

28

## INTRODUCTION

29

30

On the Perhentian reefs of Malaysia, coral abundance and coral health has been subject to decline, with decreased live coral cover (LCC) reported at longitudinally assessed sites (Reef Check Malaysia, 2007–2019). In

31 2017, reef assessments conducted by the Perhentian Marine Research Station confirmed this downward trend in  
32 coral reef integrity. An analysis of 41 unique sites around the Perhentian Islands indicated a live coral cover  
33 average of 27.00 % (SD= 14.000) (Perhentian Marine Research Station, unpublished data). These estimates shift  
34 overall reef health at the Perhentian coral reefs from a general classification of 'fair' to 'poor'.

35

36 Monitoring of coral reefs around the Perhentian Islands is achieved predominantly through citizen science  
37 programmes, which apply simple but effective survey methods using volunteers (; Reef Check Malaysia, 2010;  
38 Hunter, Alabri & van Inge, 2013). These approaches collect relevant reef data to calculate reef integrity values,  
39 which in turn provide valuable insight for marine park zone designation (Hunter, Alabri & van Inge, 2013; Lau  
40 et al., 2019). As determinants of reef integrity, surveys observe various bio-indicators theorised to be related to  
41 reef health (Hodgson & Stepath, 1999; Reef Check Malaysia, 2007–2019). Although these methods are valuable  
42 and both cost- and time-efficient, they can overlook competition dynamics on the reefs, subsequently introducing  
43 risk for misinterpretation, misinformation, and ill-informed management decisions (Wood & Dipper, 2008;  
44 Norström et al., 2009; Tun et al., 2013; D'Angelo & Wiedermann, 2014; Tkachenko & Britayev, 2016).

45

46 An example of a reef health indicator with more complex mechanisms than are captured in volunteer monitoring  
47 programmes, regards nutrient indicator (macro)algae (NIA) as a determinant of coral competition on the reef  
48 (Littler & Littler, 2007). In theory, the recording of macroalgae abundance indirectly gauges dissolved nutrient  
49 levels, which in turn is negatively associated with coral survival (Littler & Littler, 2013). However, using algae  
50 cover to pinpoint eutrophication effects can introduce flaws (Harris, 2015). High macroalgal abundance does not  
51 necessarily indicate elevated levels of dissolved nutrients as some macroalgae species can thrive independent of  
52 nutrient levels (Harris, 2015). High macroalgal presence may in fact be associated with top-down effects such as  
53 overfishing (Norström et al., 2009). More so, not all types of nutrient indicator algae found on the reef detract  
54 from coral growth in the same fashion (Littler & Littler, 2007; 2013; Harris, 2015), thus requiring careful  
55 interpretation. Another reef health indicator regards sea anemones (*Actiniaria*), which can capitalise off of  
56 collapse or imbalance events on coral reefs (Chen & Dai, 2004; Tkachenko et al., 2007; Liu et al., 2009;  
57 Tkachenko & Britayev, 2016), but which also associate with live coral in healthy reef settings (Liu et al., 2009).  
58 As such, inspecting the abundance of relevant reef species in more detail could overcome inaccuracy pitfalls by  
59 presenting a complementary assessment of coral reef competitors and their population dynamics, which is the  
60 aim of this research study.

61  
62 The reef assessments currently used around the Perhentian Islands monitor sea anemone abundance collectively  
63 with tunicates, hydroids, and corallimorphs (Reef Check Malaysia, 2019). However, local fishermen have  
64 expressed a notable increase in hosting sea anemone abundance, with *Heteractis magnifica* displaying substantial  
65 aggregated beds around certain reef regions. Though associated with live coral, increased sea anemone  
66 abundance has been found to negatively influence coral planula recruitment and impacts coral recovery rates  
67 (Liu et al., 2015; Tkachenko & Britayev, 2016). As such, intensified monitoring of hosting sea anemones is  
68 valuable and relevant to better understanding the Perhentian reef dynamics. Furthermore, focussing on hosting  
69 sea anemone abundance patterns around these reefs offers exploration of whether these hosting sea anemones are  
70 significantly associated with live coral abundance on the coral reefs of the Perhentian Islands. As such, the  
71 current study set out to explore relationships between sea anemone presence and live coral cover around the  
72 Perhentian Islands, in addition to surveying sea anemone populations to establish a baseline measure for the  
73 Perhentian reefs.

74  
75 Like corals, sea anemones have strict environmental requirements due to their dependency on algal symbionts  
76 (Allen, 1975; Fautin & Allen, 1997; Allen et al., 2003), restricting their dominant habitats to the photic zone.  
77 Also similar to corals, sea anemones have tentacles with nematocysts for defence, plankton capture, and  
78 opportunistic predation (Fautin, 1991). Compared to corals though, sea anemones depend on zooxanthellae to a  
79 lesser degree, as they obtain relatively more nutrients through feeding on zooplankton and detritus (Godinot &  
80 Chadwick, 2009; Liu et al., 2009). They acquire the bulk of their nutritional needs through zooxanthellic  
81 photosynthetic symbionts, in addition to having a capacity for nutrient absorption from the water column through  
82 skin tissue (West, de Burgh & Jeal, 1977). Sea anemones also require specific elements for growth including  
83 ammonia, phosphate, nitrogen and sulphur (Davies, 1988; Godinot & Chadwick, 2009).

84  
85 Sea anemones are described as direct coral competitors, and their elevated presence has been reported following  
86 outbreaks on newly colonised reefs (Chen & Dai, 2004; Kuguru et al., 2004; Tkachenko & Britayev, 2016). Sea  
87 anemone abundance is also reported to be positively influenced by dissolved nutrient levels (Liu et al., 2009;  
88 2015), with suitable environments allowing sea anemone aggregation into extensive beds (Fautin & Allen, 1997;  
89 Brolund et al., 2004). Under favourable settings, sea anemones can outcompete stony corals for attachment  
90 substrates (Liu et al., 2009). Given sea anemones' longevity, their potential for year-round asexual reproduction

91 (Fautin & Allen, 1997; Holbrook & Schmitt, 2005), and their fast rate of growth, under positive conditions sea  
92 anemones may quickly increase their presence at reef habitats that were previously coral dominated.

93

94 Ten sea anemone species have evolved the capacity to host symbiotic anemonefish (*Amphiprion*) (Fautin &  
95 Allen 1997). Papua New Guinea is the only current location known to house all species of sea anemones with  
96 hosting capacity. For the remainder of the Indo-West Pacific region, prevalence tends to include half of all sea  
97 anemone species with hosting capacity (Fautin & Allen, 1997). Around the Perhentian Islands, seven hosting sea  
98 anemone species are currently located, including *Heteractis magnifica*, *Heteractis crispa*, *Heteractis aurora*,  
99 *Entacmaea quadricolor*, *Stichodactyla gigantea*, *Stichodactyla haddoni* and *Stichodactyla mertensii*.

100

101 Sea anemones with hosting capacity have the ability to recycle nutrients from waste excreted by symbiotic fish  
102 (Holbrook & Schmitt, 2005; Godinot & Chadwick, 2009; Roopin & Chadwick, 2009; Szczebak, 2013). In fact,  
103 sea anemones that successfully host ectosymbionts such as anemonefish have greater concentrations of  
104 zooxanthellae, which positively affects growth (Holbrook & Schmitt, 2005). When sea anemones are actively  
105 hosting, growth rates have been reported to increase threefold compared to their not actively hosting  
106 counterparts. Holbrook & Schmitt's research also revealed that actively hosting sea anemones have significantly  
107 higher asexual reproductive rates than sea anemones without active hosting status, which has been suggested as a  
108 driving mechanism for aggregates of identical individuals (Sebens, 1983). The symbiotic relationship between  
109 sea anemones and anemonefish also provides benefits at night (Szczebak, et al., 2013). Anemonefish influence  
110 oxygen levels of the host sea anemones by altering flow rates around the host tissue during night time. Thus, the  
111 symbiotic relationship that hosting sea anemones can maintain with resident anemonefish offers benefits that can  
112 facilitate growth, formations, and abundance on coral reefs.

113

114 The current study investigated hosting sea anemone distributions at two Perhentian reef sites. Furthermore, this  
115 study sought to conduct a preliminary exploration of the associations between sea anemone abundance and live  
116 coral presence. The following research questions were formulated: (1) What are the hosting sea anemone species  
117 distributions, size estimates, active hosting indicators, formation types, and distribution patterns at Village Reef  
118 and Teluk Keke? (2) Are there significant differences in sea anemone size between actively hosting sea  
119 anemones versus not actively hosting sea anemones? (3) Are there differences in formation types based on the

120 hosting status of sea anemones? And, (4) are there significant associations between hosting sea anemone  
121 presence and live coral cover at the Perhentian reef sites?

122

123

## MATERIALS & METHODS

124 Data was collected at Village Reef (central coordinates: 5°53'39.05" N, 102°43'37.61" E) and Teluk Keke  
125 (central coordinates:5°53'14.0316"N, 102°44'20.9004"E). Village Reef is also locally referred to as 'Nemo' in  
126 acknowledgement of its high abundance of hosting sea anemones and anemonefish. It lies on the intertidal zone  
127 off the southeast of Perhentian Kecil (**Fig. 1a**). Teluk Keke (**Fig.1b**) is located to the West of Perhentian Besar,  
128 and its reef contains rocky areas in combination with sheltered regions of shallow reef.

129

130 Between August 5<sup>th</sup> 2020 and August 20<sup>th</sup>, 2020, SCUBA was used to study hosting sea anemone populations as  
131 well as measure coral cover at the two research sites. At site regions too shallow for SCUBA (depth <2.0m), data  
132 was collected using freediving techniques. Within the boundaries of survey area Village Reef, a total of ten 20  
133 meter transects were laid out in parallel using a 225° southwest bearing, as well as spatial referencing from a  
134 stable landmark. At Teluk Keke, ten 20 meter transects were also laid out in parallel, using a 270° northwest  
135 bearing. At Teluk Keke, a partially exposed rock made for a natural landmark for additional spatial referencing.  
136 The distance between parallel transects was set at 4 meters to allow optimal observation whilst mitigating  
137 inflated counts caused by overlap. Upon laying of the transect, two trained research divers regressed along the  
138 line, taking a two-meter perpendicular width and they recorded all relevant study information.

139

140

141

142 Fig. 1. Survey sites Village Reef, at Pulau Perhentian Kecil (a) and Teluk Keke on Pulau Perhentian Besar (b), with depiction  
143 of transects within the research sites.

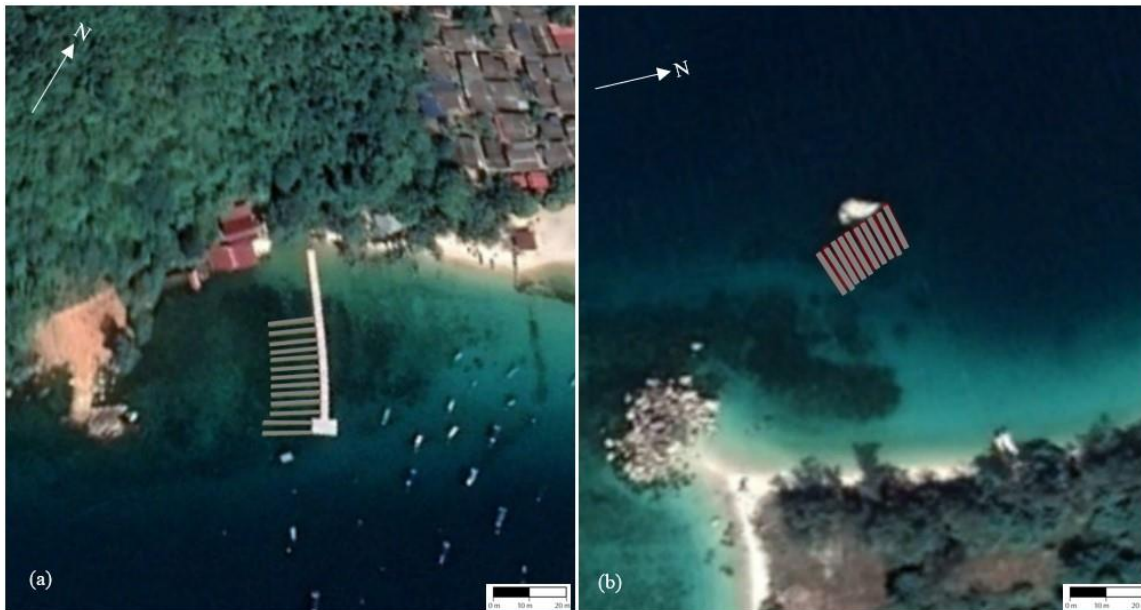

144  
145 Note. Image source: Google 2020, CNES/Airbus, 1 cm: 20 m. At Village Reef, the three shallowest transects initially included in the survey  
146 site were discarded due to a lack of hosting sea anemone presence.

147

148 When encountering a sea anemone, a long and short axis measurement of the oral disc was taken using a tailor's  
149 tape. In addition, relevant spatial mapping measures were taken including transect identifiers and transect  
150 distance readings. Sea anemone species were visually identified, the formation type was recorded (Allen, 1975;  
151 Fautin & Allen, 1997; Allen et al., 2003), hosting status was determined (Fautin & Allen, 1997; Holbrook &  
152 Schmitt, 2005), and any resident anemonefish were visually identified for species identification (Fautin & Allen,  
153 1997; Allen et al., 2003; Wood & Aw, 2017). When experiencing ambiguity, video footage was collected to  
154 allow cross referencing ex situ. In classifying formations of clusters of sea anemones, individuals were assessed  
155 as forming a cluster if a fully expanded individual's tentacles could touch a neighbouring sea anemone (Sebens,  
156 1983; Brolund et al., 2004).

157

158 As formulas to calculate area coverage assume full coverage between the elliptical long and short axis (Hirose,  
159 1985), clusters which did not fully cover the substrate, or clusters which did not assume an elliptical shape, were  
160 adjusted for by recording area cover estimates. Furthermore, site rugosity measurements were taken to account  
161 for site complexity in subsequent sea anemone cover estimates (Knudby & LeDrew, 2007). To calculate area  
162 cover percentages of the sampled sea anemones, cover estimates were divided by transect segment area, which  
163 was calculated at 20 m<sup>2</sup> excluding site complexity adjustments (4-meter width x 5-meter length intervals along

164 the 20-meter transect line, for a total area per transect of 80 m<sup>2</sup>). To calculate live coral cover, the substrate  
165 directly underneath the same transect line was visually identified at 50 cm intervals, at a total of 40 points per  
166 transect line (Manuputty Djuwariah, 2009). Hard and soft coral data points were subsequently extracted to  
167 inform LCC percentage estimates.

168

169 All data collection sessions took place between 0830 hours and 1159 hours, and visibility during data collection  
170 had to be over five meters as a prerequisite to diving. An interobserver analysis (Hartmann, 1977) revealed an  
171 overall recording and identification accuracy of 96,70 %. All statistical analyses were run using IBM SPSS  
172 (Statistical Package for the Social Sciences) for Windows, version 27.0.

173

174

## RESULTS

175 At Village Reef, several hosting sea anemone species could be identified, including *Stichodactyla gigantea*,  
176 *Stichodactyla mertensii*, and most notably *Heteractis magnifica* (**Table 1**). As for Teluk Keke, three species of  
177 hosting sea anemone were recorded: *Heteractis magnifica*, *Entacmaea quadricolor*, and *Stichodactyla mertensii*.  
178 At Teluk Keke *Heteractis magnifica* also demonstrated higher abundance compared to other species (**Table 1**).

179

180 At Village Reef, a total of 227 sea anemone formations were identified and analysed. *Heteractis magnifica* was  
181 the most dominant sea anemone species, with 98.24 % presence (N= 223). Furthermore, three specimens of  
182 *Stichodactyla gigantea* were identified, and one *Stichodactyla mertensii* specimen was recorded (**Table 2**). The  
183 average size of all studied sea anemones was 0.129 m<sup>2</sup> (SD= 0.195 m<sup>2</sup>, MIN= 0.002 m<sup>2</sup>, MAX= 1.891 m<sup>2</sup>). The  
184 average size of just *Heteractis magnifica* sea anemones was 0.130 m<sup>2</sup> (SD= 0.197 m<sup>2</sup>, MIN= 0.002 m<sup>2</sup>, MAX=  
185 1.891 m<sup>2</sup>). The total cover of hosting sea anemones at Village Reef was 29.32 m<sup>2</sup> and the total calculated cover  
186 pertaining solely to *Heteractis magnifica* was 29.05 m<sup>2</sup>.

187

188 For all hosting sea anemones at Village reef, 77.53 % were actively hosting *Amphiprion spp.* at the time of  
189 analysis (N= 176). Of *Heteractis magnifica*, 77.58 % were actively hosting (N= 173). Of the actively hosting sea  
190 anemones surveyed at Village Reef, 84.09 % hosted *Amphiprion ocellaris* symbionts (N= 148), 15.34 % were  
191 found to host *Amphiprion perideraion* (N= 16), and one formation hosted both *Amphiprion ocellaris* and  
192 *Amphiprion perideraion* at 0.57 %. As for formations (**Table 2**), for all sea anemone species, 51.41 % were



193 solitary formations, with the remainder clustered in formation (**Table 2**). Regarding *Heteractis magnifica*, 50.67  
194 % of the sample contained solitary formations, with the remainder present in clustered formation (**Table 2**).

195

196 The hosting sea anemone cover estimates were also calculated per transect (**Table 3**) to allow analysis of the  
197 relationship between live coral cover and sea anemone abundance. The average percentage cover of all sea  
198 anemones for the ten transects was 3.67 % per transect (MIN= 0.56 %, MAX= 11.96 %), with an average live  
199 coral cover of 39.00 % (MIN= 17.50 %, MAX= 60.0 %). Other descriptives are further presented in **Table 3**.

200

201 At Teluk Keke, a total of 176 sea anemones formations were identified and analysed. Here, *Heteractis magnifica*  
202 was also the most dominant species, with 86.93 % presence (N= 153). *Entacmaea quadricolor* species had the  
203 second highest abundance levels, at 11.93 % (N= 21). Just two specimens of *Stichodactyla mertensii* were  
204 recorded (**Table 1**), representing 1.14 % of the total sample. The average size of all studied sea anemones was  
205 0.043 m<sup>2</sup> (SD= 0.027 m<sup>2</sup>, MIN= 0.005 m<sup>2</sup>, MAX= 0.161 m<sup>2</sup>). The average size of *Heteractis magnifica* was also  
206 0.043 m<sup>2</sup> (SD= 0.025 m<sup>2</sup>, MIN= 0.008 m<sup>2</sup>, MAX= 0.161 m<sup>2</sup>). The total cover of hosting sea anemones at Teluk  
207 Keke was 7.533 m<sup>2</sup> and the total calculated cover pertaining solely to *Heteractis magnifica* was 6.569 m<sup>2</sup>.

208

209 For all hosting sea anemones at Teluk Keke, 89.20 % were actively hosting *Amphiprion spp.* (N= 157) (**Table**  
210 **4**). For *Heteractis magnifica* only, 88.24 % were actively hosting (N= 135). Of these actively hosting sea  
211 anemones at Teluk Keke, 76.43 % hosted *Amphiprion ocellaris* symbionts (N= 120), and 10.19 % were found to  
212 host *Amphiprion perideraion* (N= 16). Furthermore, *Amphiprion frenatus* was found to reside on 12.74 % of  
213 actively hosting sea anemones (N= 20) and one sea anemone was actively hosting *Amphiprion clarkii*, at a  
214 percentage of 0.64 %.

215

216 As for formations (**Table 4**), sea anemones at Teluk Keke were found only in solitary formations or in clusters  
217 including less than five individuals. For all sea anemone species, 85.80 % were solitary formations, with the  
218 remainder clustered in formations of less than five individuals (**Table 4**). Regarding *Heteractis magnifica*, 84.31  
219 % regarded solitary individuals. Relevant descriptives are further presented in **Table 4**.

220



221 The highest sea anemone coverage was localised around the centre of survey site Teluk Keke (**Table 3**). The  
 222 average LCC at Teluk Keke was 20.00 % (MIN= 7.50 %, MAX= 32.50 %), with an average hosting sea  
 223 anemone cover of 0.94 % (MIN= 0.04 %, MAX= 2.17 %) per transect.

224

225 Table 1. Hosting sea anemone species located at Village Reef and Teluk Keke, including abundance and tentacle detail.

226

| Species                        | Abundance (N) |            | Tentacle detail                                                                      |
|--------------------------------|---------------|------------|--------------------------------------------------------------------------------------|
|                                | Village Reef  | Teluk Keke |                                                                                      |
| <i>Heteractis magnifica</i>    | 223           | 153        |    |
| <i>Stichodactyla gigantea</i>  | 3             | 0          |   |
| <i>Stichodactyla mertensii</i> | 1             | 2          |  |
| <i>Entacmaea quadricolor</i>   | 0             | 21         |  |

227

228

229 Table 2. Population descriptors for the hosting sea anemones at Village Reef, including size and cover estimates for hosting  
 230 status, formation types, and sea anemone species.

231

| <b>Village Reef</b>                     |          |                                  |                           |                                   |
|-----------------------------------------|----------|----------------------------------|---------------------------|-----------------------------------|
|                                         | <b>N</b> | <b>Mean size (m<sup>2</sup>)</b> | <b>SD (m<sup>2</sup>)</b> | <b>Area Cover (m<sup>2</sup>)</b> |
| <i>Heteractis magnifica</i>             | 223      | 0.130                            | 0.197                     | 29.050                            |
| <i>Stichodactyla gigantea</i>           | 3        | 0.063                            | 0.017                     | 0.189                             |
| <i>Stichodactyla mertensii</i>          | 1        | 0.083                            | n.a.                      | 0.083                             |
| Total                                   | 227      | 0.129                            | 0.195                     | 29.322                            |
| Hosting Status                          |          |                                  |                           |                                   |
| Active Hosting                          | 176      | 0.157                            | 0.209                     | 27.369                            |
| Not active hosting                      | 51       | 0.038                            | 0.096                     | 1.953                             |
| Formation Type                          |          |                                  |                           |                                   |
| Solitary                                | 117      | 0.038                            | 0.031                     | 4.471                             |
| Cluster <5                              | 62       | 0.116                            | 0.099                     | 7.177                             |
| Cluster 6–10                            | 26       | 0.240                            | 0.098                     | 6.252                             |
| Cluster 11–15                           | 13       | 0.340                            | 0.127                     | 4.420                             |
| Cluster 16+                             | 9        | 0.778                            | 0.478                     | 7.002                             |
| <i>Heteractis magnifica</i><br>(N= 223) |          |                                  |                           |                                   |
| Hosting Status                          |          |                                  |                           |                                   |
| Active Hosting                          | 173      | 0.157                            | 0.210                     | 27.179                            |
| Not active hosting                      | 50       | 0.037                            | 0.096                     | 1.871                             |
| Formation Type                          |          |                                  |                           |                                   |
| Solitary                                | 113      | 0.037                            | 0.030                     | 4.199                             |
| Cluster <5                              | 62       | 0.116                            | 0.099                     | 7.177                             |
| Cluster 6–10                            | 26       | 0.240                            | 0.098                     | 6.252                             |
| Cluster 11–15                           | 13       | 0.340                            | 0.127                     | 4.420                             |
| Cluster 16+                             | 9        | 0.778                            | 0.478                     | 7.002                             |

232

233 Table 3. Population descriptors for the hosting sea anemones at Teluk Keke, including size and cover estimates for hosting  
 234 status, formation types, and sea anemone species.

235

| <b>Teluk Keke</b>                       |          |                                  |                           |                                   |
|-----------------------------------------|----------|----------------------------------|---------------------------|-----------------------------------|
|                                         | <b>N</b> | <b>Mean size (m<sup>2</sup>)</b> | <b>SD (m<sup>2</sup>)</b> | <b>Area Cover (m<sup>2</sup>)</b> |
| <i>Heteractis magnifica</i>             | 153      | 0.043                            | 0.025                     | 6.569                             |
| <i>Stichodactyla mertensii</i>          | 2        | 0.130                            | 0.009                     | 0.260                             |
| <i>Entacmaea quadricolor</i>            | 21       | 0.034                            | 0.023                     | 0.704                             |
| Total                                   | 176      | 0.043                            | 0.027                     | 7.533                             |
| Hosting Status                          |          |                                  |                           |                                   |
| Active Hosting                          | 157      | 0.045                            | 0.027                     | 7.057                             |
| Not active hosting                      | 19       | 0.025                            | 0.018                     | 0.477                             |
| Formation Type                          |          |                                  |                           |                                   |
| Solitary                                | 151      | 0.037                            | 0.021                     | 5.648                             |
| Cluster <5                              | 25       | 0.075                            | 0.034                     | 1.886                             |
| <i>Heteractis magnifica</i><br>(N= 223) |          |                                  |                           |                                   |
| Hosting Status                          |          |                                  |                           |                                   |
| Active Hosting                          | 135      | 0.045                            | 0.026                     | 6.098                             |
| Not active hosting                      | 18       | 0.026                            | 0.018                     | 0.472                             |
| Formation Type                          |          |                                  |                           |                                   |
| Solitary                                | 129      | 0.037                            | 0.018                     | 4.761                             |
| Cluster <5                              | 24       | 0.075                            | 0.035                     | 1.809                             |

236

237

238 Table 4. Area and percentage cover for hosting sea anemones and LCC percentages at Village Reef and Teluk Keke.

239

| Hosting Sea Anemone Descriptives |                |                         |           |                 |                         |           | LCC       |           |
|----------------------------------|----------------|-------------------------|-----------|-----------------|-------------------------|-----------|-----------|-----------|
| Village Reef (VR)                |                |                         |           | Teluk Keke (TK) |                         |           | VR        | TK        |
| Transect                         | Formations (N) | Cover (m <sup>2</sup> ) | Cover (%) | Formations (N)  | Cover (m <sup>2</sup> ) | Cover (%) | Cover (%) | Cover (%) |
| 1                                | 52             | 7.504                   | 9.38      | 1               | 0.036                   | 0.05      | 20.00     | 7.50      |
| 2                                | 75             | 7.226                   | 9.03      | 3               | 0.192                   | 0.24      | 35.00     | 25.00     |
| 3                                | 47             | 9.568                   | 11.96     | 13              | 0.477                   | 0.60      | 17.50     | 27.50     |
| 4                                | 29             | 3.025                   | 3.78      | 19              | 0.653                   | 0.82      | 22.50     | 15.00     |
| 5                                | 10             | 1.203                   | 1.50      | 39              | 1.717                   | 2.15      | 45.00     | 17.50     |
| 6                                | 6              | 0.353                   | 0.44      | 35              | 1.470                   | 1.84      | 45.00     | 15.00     |
| 7                                | 3              | 0.167                   | 0.21      | 37              | 1.734                   | 2.17      | 60.00     | 20.00     |
| 8                                | 1              | 0.045                   | 0.06      | 17              | 0.755                   | 0.94      | 50.00     | 32.50     |
| 9                                | 2              | 0.144                   | 0.18      | 11              | 0.470                   | 0.59      | 45.00     | 27.50     |
| 10                               | 2              | 0.086                   | 0.11      | 1               | 0.030                   | 0.04      | 50.00     | 12.50     |

240

241 To control for interspecies differences in size, abundance patterns, and formations (Allen, 1975; Fautin & Allen,  
 242 1997; Allen et al., 2003), data pertaining only to *Heteractis magnifica* was extracted to answer the second and  
 243 third research question. To test for differences in size between the actively hosting sea anemones versus not  
 244 active hosting sea anemones, a Mann-Whitney U test was used as data was non-normal (Village Reef:  
 245 Kolmogorov-Smirnov= .527,  $p < .001$ ; Teluk Keke: Kolmogorov-Smirnov= .127,  $p < .001$ ). Results revealed a  
 246 significant difference in sea anemone size at Village Reef ( $U = 7625.000$ ,  $p < .001$ ,  $SE = 401.826$ ,  $N = 223$ ) for  
 247 actively versus not actively hosting *Heteractis magnifica*, where the actively hosting sea anemones are  
 248 significantly larger (**Table 3**). The Mann Whitney U test for Teluk Keke also revealed a significant difference in  
 249 size between active and not active hosting status of *Heteractis magnifica* ( $U = 1849.000$ ,  $p < .001$ ,  $SE = 176.589$ ,  
 250  $N = 153$ ), with larger sizes recorded for the actively hosting sea anemones (**Table 3**).

251

252 Further statistical testing was conducted to assess whether the hosting status of sea anemones, active versus not  
 253 active, at Village Reef and Teluk Keke is significantly related to their formation, based on previous research  
 254 indicating that actively hosting sea anemones engage in higher rates of asexual reproduction (Fautin & Allen,  
 255 1997; Holbrook & Schmitt, 2005) which is argued to underlie clustered formations of individuals (Sebens, 1983;  
 256 Fautin & Allen, 1997; Brolund et al., 2004). As such, Chi-Square tests were conducted to test the relationship

257 between hosting status and cluster formations for *Heteractis magnifica* at both survey sites. Results demonstrate  
258 that actively hosting *Heteractis magnifica* were more often encountered in clusters at Village Reef ( $X^2(6) =$   
259 40.892,  $p < .001$ ), though results for Teluk Keke were marginally nonsignificant ( $X^2(1) = 3.795$ ,  $p = .051$ ).

260

261 Finally, to test whether hosting sea anemone presence significantly correlates with live coral cover, as has been  
262 argued in previous research (Liu et al., 2009; Tkachenko & Britayev, 2016), sea anemone cover and live coral  
263 cover at both survey sites were analysed using a Spearman's correlation test (**Table 4** and **Figure 2**). Results of  
264 the correlation analysis indicate that at Village Reef, hosting sea anemone cover significantly negatively  
265 correlates with live coral cover (Spearman's rho =  $-0.886$ ,  $p = .001$ ,  $N = 10$ ). Higher levels of sea anemone cover at  
266 Village Reef are associated with lower levels of live coral cover. As for Teluk Keke, no significant associations  
267 were found between sea anemone presence and live coral cover.

268

269 Fig. 2. Scatter plot including line of best fit displaying the association between hosting sea anemone cover and live coral  
270 cover at Village Reef.

271

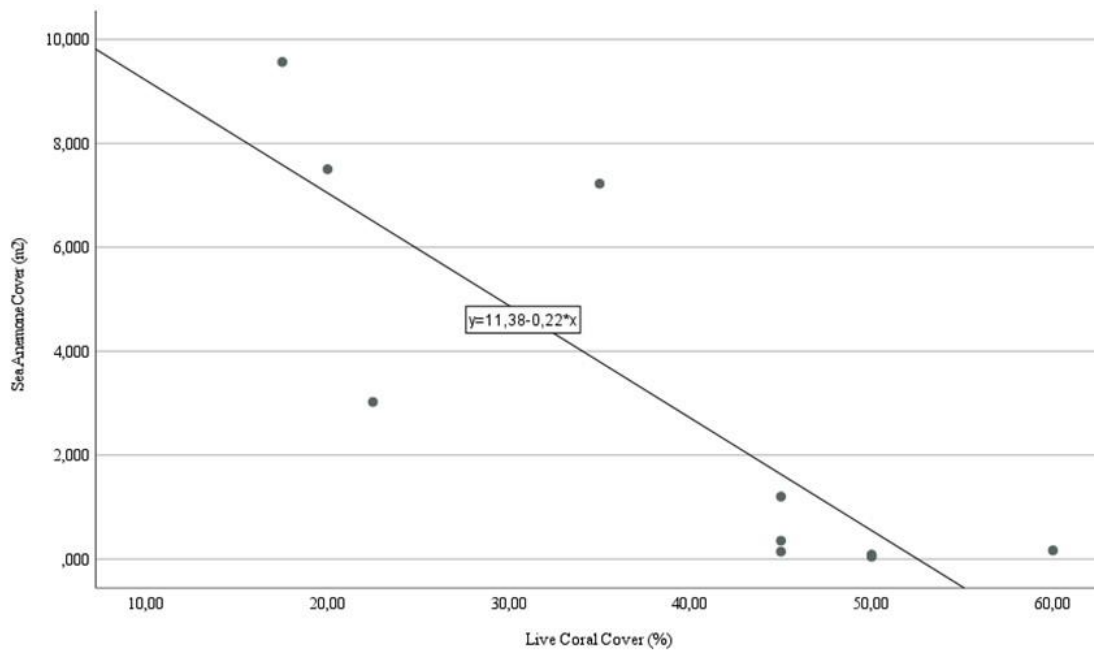

272

273 Note.  $R^2 = 0.714$ .

274

275

276

## DISCUSSION

277 The current study sought to provide preliminary insight on hosting sea anemone assemblages found around the  
278 Perhentian islands, including an investigation into their population descriptives and associations with live coral  
279 presence on the reefs. Two survey sites were assessed, and data was collected on species distributions, size  
280 estimates, hosting status, and formation types. More so, the study wanted to assess whether there were size  
281 differences in sea anemones based on hosting status, whether actively hosting sea anemones were more often  
282 encountered in clusters, as well as exploring associations between hosting sea anemones and live coral cover.

283

284 At Village Reef, hosting sea anemone distributions were more concentrated at the deeper transects of the site.  
285 Similar to findings at Teluk Keke, the dominant species regarded *Heteractis magnifica*, although the presence of  
286 *Stichodactyla gigantea* was unique to Village Reef. Also unique to Village Reef was the larger presence of  
287 clustering formations of hosting sea anemones. At Village Reef hosting sea anemones were larger and more  
288 often found in clustered formation. More so, a negative correlation was seen when comparing hosting sea  
289 anemone cover to live coral cover. On transects with higher levels of sea anemone cover, live coral cover  
290 estimates were generally lower.

291

292 The findings related to Village Reef support previous research on the ability of hosting sea anemones to  
293 outcompete corals (Liu et al., 2009; Tkachenko & Britayev, 2016). More so, almost half of all surveyed sea  
294 anemones at this site were clustered in formation, which has been proposed to indicate increased asexual  
295 reproductive success, and is thought to underlie higher levels of sea anemone aggression (Turner et al., 2003;  
296 Holbrook & Schmitt, 2005). The sea anemones that were actively hosting *Amphiprion* at Village Reef were also  
297 more often encountered in clusters. The sea anemones' higher ability to absorb waste excreted by resident fish,  
298 which in turn stimulates growth and asexual reproductive rates (Holbrook & Schmitt, 2005; Liu et al., 2009;  
299 Roopin & Chadwick, 2009; Cleveland, Verde & Lee, 2011) likely drives this finding at Village Reef.

300

301 The study outcomes related to Teluk Keke demonstrated both similarities and differences compared to Village  
302 Reef. At Teluk Keke, actively hosting sea anemones were also significantly larger, a finding that is in line with  
303 previous research (Holbrook & Schmitt, 2005; Liu et al., 2009; Roopin & Chadwick, 2009; Cleveland, Verde &  
304 Lee, 2011). In contrast to results from Village Reef, sea anemones at Teluk Keke were not encountered in  
305 clustered formation more often. It might be that the specimens at Teluk Keke were still in juvenile stages, as the

306 average size of specimens located at Teluk Keke was smaller, and as juvenile sea anemones are believed not to  
307 cluster with the same frequency as adults (Turner et al., 2003).

308

309 At Teluk Keke, *Entacmaea quadricolor* specimens were recorded, a species which was not located at Village  
310 Reef. More so, the analysis revealed no significant associations with live coral cover at Teluk Keke. It could well  
311 be that environmental factors present at Teluk Keke are substantially different from Village Reef, which in turn  
312 influences the local population dynamics and microhabitat use on the reef (Chomsky et al., 2004; Dixon et al.,  
313 2014). The lack of findings regarding hosting status and formation types could also be the result of reduced  
314 statistical power, as only a small number of hosting sea anemones at this site were clustered in formation. With  
315 continued monitoring of this site, the new questions that have arisen can be investigated.

316

### 317 **Limitations.**

318 Although we aimed to maintain the best standards for scientific rigour, the current study has several limitations.  
319 First of all, assessment of hosting status was conducted using in-water direct observation by trained researchers.  
320 Though the inter-observer accuracy was high, data collection methods using in-water observations to assess fish  
321 behaviours can introduce some disadvantages compared to the use of video recording techniques (Branconi,  
322 Wong & Buston, 2019), which may have influenced the accuracy of the hosting status observations as presence  
323 of the diver may have impacted resident fish behaviours and visibility.

324

325 Second, size estimates for the hosting sea anemones were collected using the oral disc diameter as opposed to the  
326 pedal disc diameter. Scientific consensus posits that the pedal disc diameter is preferable, as oral disc  
327 measurements are subject to diurnal expansion rates (Allen, 1975). However, the presence of large clustered  
328 formations at Village Reef in addition to the high structural complexity found at Teluk Keke drove the decision  
329 to measure oral disc diameters, and to estimate cluster sizes using the short and long axis across the aggregated  
330 clustered formation. As such, inaccuracies due to expansion or contraction behaviours could have been  
331 introduced into the data, although all data collection dives were set to occur in the mornings to control for such  
332 effects.

333

334 Third, the current study only assessed two Perhentian reefs as a consequence of the novel coronavirus pandemic  
335 during the timing of the study. As a result, findings related to Village Reef and Teluk Keke have yet to be

336 compared to other sites around the Perhentian islands, which means that caution should be taken when  
337 extrapolating the current findings to other sea anemone populations around the Perhentian Reefs. Fourth and  
338 finally, the live coral cover estimates were calculated using a simplified strategy compared to the methods used  
339 to estimate hosting sea anemone cover. As such, fewer data points were available for live coral cover estimates,  
340 which, should erroneous readings have been present, could have a disproportionate effect on coral estimates.  
341 Replication studies should be done to ensure accuracy of the current findings when comparing coral and sea  
342 anemone cover.

343

#### 344 **Practical implications and future directions.**

345 This study provided a first investigation into hosting sea anemone populations around the Perhentian Islands of  
346 Malaysia. In line with previous research, the sea anemones that were actively hosting were significantly larger  
347 than not actively hosting sea anemones, which provides evidence that these populations are benefiting from the  
348 presence of symbiotic anemonefish (Hollbrook & Schmitt, 2005; Godinot & Chadwick, 2009; Liu et al., 2009;  
349 Roopin & Chadwick, 2009; Cleveland, Verde & Lee, 2011). Additionally, evidence was presented to indicate  
350 that actively hosting sea anemones were also more often found in clustered formation, and associations were  
351 found to suggest that, in areas with higher abundance of hosting sea anemones live coral levels were lower,  
352 which is in line with prior research in Southeast Asia (Tkachenko & Britayev, 2016).

353

354 The findings of the study imply that, at Village Reef, the sea anemone population display growth and  
355 reproduction behaviours that are similar to other geographical regions and laboratory settings (Holbrook &  
356 Schmitt, 2005; Liu et al., 2009). More so, with the identification of clustered sea anemones within extensive  
357 aggregates, the current study supports previous reports on the ability of sea anemones to aggregate in waters  
358 around Malaysia (Fautin & Allen, 1997; Allen et al., 2003; Brolund et al., 2004; Wood & Aw, 2017), and  
359 extends these findings to include the Perhentian reefs as a location where such aggregates can be found. The  
360 current findings are highly relevant as previous studies mention a lack of available data on sea anemone  
361 abundance on coral reefs (Norström et al., 2009). By providing a first assessment of hosting sea anemones on the  
362 Perhentian reefs, the current study offers baseline population descriptions that can inform population trends in  
363 upcoming research.

364



365 The study provides several important directions for future research. Regarding the two sites that were included,  
366 future research should continue to focus their research efforts on these sites, as longitudinal trends can be studied  
367 using the current results as a baseline (e.g. Versteeg, Campbell & Halid, preprint). Furthermore, to allow general  
368 population estimates for the Perhentian Islands the amount of research sites should be expanded. Sites without  
369 marked hosting sea anemone presence may also be included in future research so that the association between  
370 live coral cover and sea anemone abundance can be further explored, in addition to allowing deeper exploration  
371 of impacted corals at the genus level (Tkachenko & Britayev, 2016).

372  
373 Finally, the current research set-up could yield more widespread implications by striving to include abiotic  
374 measures in upcoming surveys. Measuring influential factors such as nutrient levels, water temperature,  
375 sedimentation, soft coral presence, bleaching events, and algal abundance (Nugues & Roberts, 2003; Chomsky et  
376 al., 2004; Wood & Dipper, 2008; Tun et al., 2013) will enhance the potential to provide instrumental insights. By  
377 including such factors, results may tap into localised expansive behaviours of sea anemones, algal dynamics can  
378 be inspected to assess coral and sea anemone competition dynamics, the sensitivity of corals and sea anemones to  
379 bleaching can be examined, and valuable information on the abundance of other implicated benthic invertebrates  
380 can be obtained. Collectively, such continued research effort into sea anemone abundance at the Perhentian reefs  
381 will help to improve the accuracy of coral reef integrity measures, and it will contribute pertinent information in  
382 support of reef management and conservation efforts.

383

384

385

## AKNOWLEDGEMENT

386 This research and its resultant report were produced with the support of Perhentian Marine Research Station  
387 (<https://www.marineresearchstation.org/>). Many thanks to the team, and specifically to Fuze Ecoteer Cofounder  
388 Daniel Quilter. The data collection was conducted at reef sites Village Reef and Teluk Keke (Pulau Perhentian  
389 Kecil and Besar, respectively) with the Coral Rehabilitation Project in Perhentian Island permit JTLM 610-4/1/1  
390 Jld 3 (28) and the Strategic Partnership: Reef Care Program permit Prk. ML. 610-3/1 (9), both issued by  
391 Malaysian Marine Parks Department Taman Laut Malaysia (<http://marinepark.dof.gov.my>). The current research  
392 was carried out with the aim of informing rehabilitation prospects through habitat composition surveys, in  
393 addition to establishing baseline monitoring data on site dynamics. A big thank you is due to everyone who  
394 supported the research dives by donating to the fundraiser, by helping with dive logistics, or simply by  
395 supporting the work of the Perhentian Marine Research Station. Terima kasih banyak!

396

397

#### DATA AVAILABILITY STATEMENT

398 The data presented in this study are available upon request from the corresponding author\*. The data are not  
399 publicly available due to legal publishing constraints as defined in the regulations inherent to the permits issued  
400 by Taman Laut Malaysia.

401

402

#### LITERATURE CITED

403 Allen GR (1975) Anemonefishes and their amazing partnership. Australian Natural History, 18(8): 274-277.

404 Allen GR, Steene R, Humann P & Deloach N (2003) Reef fish identification: Tropical Pacific. New World  
405 Publications, 457 pp.

406 Branconi R, Wong MYL & Buston PM (2019) Comparison of efficiency of direct observations by scuba diver  
407 and indirect observations via video camera for measuring reef-fish behaviour. Journal of Fish Biology, 94(3):  
408 489-497.

409 Brolund TM, Tychsen A, Nielsen LE & Arvedlund M (2004) An assemblage of the host anemone *Heteractis*  
410 *magnifica* in the northern Red Sea, and distribution of the resident anemonefish. Journal of the Marine  
411 Biological Association UK, 84: 671-674.

412 Chen CA & Dai C-F (2004) Local phase shift from *Acropora*-dominant to *Condylactis*-dominant community in  
413 the Tiao-Shi Reef, Kenting National Park, southern Taiwan. Coral Reefs, 23: 508.

414 Chomsky O, Kamenir Y, Hyams M, Dubinsky Z & Chadwick-Furman NE (2004) Effects of temperature on growth  
415 rate and body size in the Mediterranean Sea anemone *Actinia equina*. Journal of Experimental Marine Biology  
416 and Ecology, 313(1): 63-73.

417 Cleveland A, Verde EA & Lee RW (2011) Nutritional exchange in a tropical tripartite symbiosis: direct evidence  
418 for the transfer of nutrients from anemonefish to host anemone and zooxanthellae. Marine Biology, 158(3):  
419 589-602.

420 D'Angelo C & Wiedenmann J (2014) Impacts of nutrient enrichment on coral reefs: new perspectives and  
421 implications for coastal management and reef survival. Current Opinion in Environmental Sustainability, 7:  
422 82-93.

423 Davies LM (1988) Nitrogen flux in the symbiotic sea anemone *Anemonia viridis* (Forsk.) Dissertation,  
424 University of Glasgow, 282 pp.

- 425 Dixon AK, Needham D, Al-Horani FA & Chadwick NE (2014) Microhabitat use and photoacclimation in the  
426 clownfish sea anemone *Entacmaea quadricolor*. Journal of the Marine Biological Association of the United  
427 Kingdom, 94(3): 473-480.
- 428 Fautin DG (1991) The anemonefish symbiosis: what is known and what is not. Symbiosis, 10: 23–46.
- 429 Fautin DG & Allen GR (1997) Field Guide to Anemonefishes and Their Host Sea Anemones. Converted for  
430 electronic publication by Humpries J & Sherman D, The MUSE project, Perth, 65pp.
- 431 Godinot C & Chadwick NE (2009) Phosphate excretion by anemonefish and uptake by giant sea anemones:  
432 demand outstrips supply. Bulletin of Marine Science, 85(1): 1-9.
- 433 Harris JL (2015) The Ecology of Turf Algae on Coral Reefs. Dissertation, UC San Diego, 201 pp. [In English].
- 434 Hartmann DP (1977) Considerations in the choice of interobserver reliability estimates. Journal of applied  
435 behavior analysis, 10(1): 103-116.
- 436 Hirose Y (1985) Habitat, distribution and abundance of coral reef sea-anemones (*Actiniidae* and  
437 *Stichodactylidae*) in Sesoko Island, Okinawa, with notes on expansion and contraction behavior. Galaxea, 4:  
438 113-127.
- 439 Hodgson G & Stepath CM (1999) Using Reef Check for long-term coral reef monitoring in Hawaii. In: Maragos  
440 JE & Grober Dunsmore R (eds). Proceedings of the Hawaii Coral Reef Monitoring Workshop. Department of  
441 Land and Natural Resources and East-West Center for Development, Honolulu, HI. Pp. 173–184.
- 442 Holbrook SJ & Schmitt RJ (2005) Growth, reproduction and survival of a tropical sea anemone (*Actiniaria*):  
443 benefits of hosting anemonefish. Coral Reefs, 24: 67-73.
- 444 Hunter J, Alabri A & van Ingen C (2013) Assessing the quality and trustworthiness of citizen science data.  
445 Concurrency and Computation: Practice and Experience, 25: 454-466.
- 446 Knudby, A., & LeDrew, E. (2007). Measuring Structural Complexity on Coral Reefs. In: Pollock NW & Godfrey  
447 JM (eds). Diving for Science (2007). Proceedings of the American Academy of Underwater Sciences 26th  
448 Symposium, Dauphin Island, AL, 203 pp.
- 449 Kuguru BL, Mgaya YD, Ohnman MC & Wagner GM (2004) The reef environment and competitive success in  
450 the Corallimorpharia. Marine Biological Journal, 145: 875-884.
- 451 Lau CM, Kee-Alfian AA, Affendi YA, Hyde J, Chelliah A, Leong YS, Low YL, Yusop PAM, Leong VT, Halimi  
452 AM, Shahir YM, Ramdhan RM, Lim AGL & Zainal NI (2019) Tracing Coral Reefs: A Citizen Science  
453 Approach in Mapping Coral Reefs to Enhance Marine Park Management Strategies. Frontiers in Marine  
454 Science, 6: 539.

- 455 Littler MM & Littler DS (2007) Assessment of coral reefs using herbivory/nutrient assays and indicator groups of  
456 benthic primary producers: a critical synthesis, proposed protocols, and critique of management strategies.  
457 *Aquatic Conservation: Marine and Freshwater Ecosystems*, 17(2): 195-215.
- 458 Littler MM & Littler DS (2013) The nature of macroalgae and their interactions on the reefs. *Smithsonian*  
459 *Contributions to the Marine Sciences*, 39: 187-198.
- 460 Liu PJ, Lin SM, Fan TY, Meng PJ, Shao KT & Lin HJ (2009) Rates of overgrowth by macroalgae and attack by  
461 sea anemones are greater for live coral than dead coral under conditions of nutrient enrichment. *Limnology*  
462 *and Oceanography*, 54(4): 1167-1175.
- 463 Liu PJ, Shao KT, Jan RQ, Fan TY, Wong SL, Hwang JS & Lin HJ (2009) A trophic model of fringing coral reefs  
464 in Nanwan Bay, southern Taiwan suggests overfishing. *Marine Environmental Research*, 68(3): 106-117.
- 465 Liu PJ, Hsin MC, Huang YH, Fan TY, Meng PJ, Lu CC & Lin HJ (2015) Nutrient enrichment coupled with  
466 sedimentation favors sea anemones over corals. *PLoS One*, 10(4): e0125175.
- 467 Manuputty Djuwariah AEW (2009) *Method Guide: Point Intercept transect (PIT) for Community, Baseline*  
468 *Study and Coral Health Monitoring at Marine No Take Zone Area (DPL). Coral Reef Rehabilitation and*  
469 *Management Program, Indonesian Institute of Sciences. Jakarta, Indonesia, 68pp.*
- 470 Norström AV, Nyström M, Lokrantz J & Folke C (2009) Alternative states on coral reefs: beyond coral-  
471 macroalgal phase shifts. *Marine ecology progress series*, 376: 295-306.
- 472 Nugues MM & Roberts CM (2003) Coral mortality and interaction with algae in relation to sedimentation. *Coral*  
473 *Reefs*, 22: 507-516.
- 474 Reef Check Malaysia (2007) *Resources: Status of Coral Reefs in Malaysia*. Reef Check Malaysia, Kuala Lumpur,  
475 Malaysia. <https://www.reefcheck.org.my/reports> (Accessed 14 November 2020).
- 476 Reef Check Malaysia (2008) *Resources: Status of Coral Reefs in Malaysia*. Reef Check Malaysia, Kuala Lumpur,  
477 Malaysia. <https://www.reefcheck.org.my/reports> (Accessed 14 November 2020).
- 478 Reef Check Malaysia (2009) *Resources: Status of Coral Reefs in Malaysia*. Reef Check Malaysia, Kuala Lumpur,  
479 Malaysia. <https://www.reefcheck.org.my/reports> (Accessed 14 November 2020).
- 480 Reef Check Malaysia (2010) *Resources: Status of Coral Reefs in Malaysia*. Reef Check Malaysia, Kuala Lumpur,  
481 Malaysia. <https://www.reefcheck.org.my/reports> (Accessed 14 November 2020).
- 482 Reef Check Malaysia (2011) *Resources: Status of Coral Reefs in Malaysia*. Reef Check Malaysia, Kuala Lumpur,  
483 Malaysia. <https://www.reefcheck.org.my/reports> (Accessed 14 November 2020).

- 484 Reef Check Malaysia (2012) Resources: Status of Coral Reefs in Malaysia. Reef Check Malaysia, Kuala Lumpur,  
485 Malaysia. <https://www.reefcheck.org.my/reports> (Accessed 14 November 2020).
- 486 Reef Check Malaysia (2013) Resources: Status of Coral Reefs in Malaysia. Reef Check Malaysia, Kuala Lumpur,  
487 Malaysia. <https://www.reefcheck.org.my/reports> (Accessed 14 November 2020).
- 488 Reef Check Malaysia (2014) Resources: Status of Coral Reefs in Malaysia. Reef Check Malaysia, Kuala Lumpur,  
489 Malaysia. <https://www.reefcheck.org.my/reports> (Accessed 14 November 2020).
- 490 Reef Check Malaysia (2015) Resources: Status of Coral Reefs in Malaysia. Reef Check Malaysia, Kuala Lumpur,  
491 Malaysia. <https://www.reefcheck.org.my/reports> (Accessed 14 November 2020).
- 492 Reef Check Malaysia (2016) Resources: Status of Coral Reefs in Malaysia. Reef Check Malaysia, Kuala Lumpur,  
493 Malaysia. <https://www.reefcheck.org.my/reports> (Accessed 14 November 2020).
- 494 Reef Check Malaysia (2017) Resources: Status of Coral Reefs in Malaysia. Reef Check Malaysia, Kuala Lumpur,  
495 Malaysia. <https://www.reefcheck.org.my/reports> (Accessed 14 November 2020).
- 496 Reef Check Malaysia (2018) Resources: Status of Coral Reefs in Malaysia. Reef Check Malaysia, Kuala Lumpur,  
497 Malaysia. <https://www.reefcheck.org.my/reports> (Accessed 14 November 2020).
- 498 Reef Check Malaysia (2019) Resources: Status of Coral Reefs in Malaysia. Reef Check Malaysia, Kuala Lumpur,  
499 Malaysia. <https://www.reefcheck.org.my/reports> (Accessed 14 November 2020).
- 500 Roopin M & Chadwick NE (2009) Benefits to host sea anemones from ammonia contributions of resident  
501 anemonefish. *Journal of Experimental Marine Biology and Ecology*, 370: 27-34.
- 502 Sebens KP (1983) Population dynamics and habitat suitability of the intertidal sea anemones *Anthopleura*  
503 *elegantissima* and *A. xanthogrammica*. *Ecological monographs*, 53(4): 405-433.
- 504 Szczebak JT, Henry RP, Al-Horani FA & Chadwick NE (2013) Anemonefish oxygenate their anemone hosts at  
505 night. *Journal of Experimental Marine Biology and Ecology*, 216: 970-976.
- 506 Tkachenko KS, Wu BJ, Fang LS & Fan TY (2007) Dynamics of a coral reef community after mass mortality of  
507 branching *Acropora* corals and an outbreak of anemones. *Marine Biological Journal*, 151: 185-194.
- 508 Tkachenko KS & Britayev TA (2016) Unusually high abundance of the actinarian *Anemonia manjano Carlgren*,  
509 1900 outcompeting scleractinians in central Vietnam. *Marine Biodiversity*, 46(3): 545-546.
- 510 Tun K, Chou LM, Low J, Yeemin T, Phongsuwan N, Setiasih N & Lane D (2013) A regional overview on the  
511 2010 coral bleaching event in Southeast Asia. *Global Coral Reef Monitoring Network*, 130 pp.

- 512 Turner VL, Lynch SM, Paterson L, León-Cortés JL & Thorpe JP (2003) Aggression as a function of genetic  
513 relatedness in the sea anemone *Actinia equina* (Anthozoa: Actiniaria). *Marine Ecology Progress Series*, 247:  
514 85-92.
- 515 Versteeg M, Campbell A, & Halid H (preprint) *Heteractis magnifica* Sea Anemone Population Dynamics at  
516 Village Reef, Perhentian Kecil, Malaysia: Monitoring of Growth, Formations, and Hosting Status. *bioRxiv*,  
517 25 pp.
- 518 West B, de Burgh M & Jeal F (1976) Dissolved organics in the nutrition of benthic invertebrates. In: Keegan BF,  
519 Boaden PJS & Ceidigh PO (eds). (1976) *Biology of benthic organisms*, Pergamon, Dublin, Ireland, 664 pp.
- 520 Wood E & Aw M (2017) *Reef fishes of South-East Asia*. Bloomsbury Natural History, 144 pp.
- 521 Wood E & Dipper F (2008) What is the future for extensive areas of reef impacted by fish blasting and coral  
522 bleaching and now dominated by soft corals? A case study from Malaysia. *Proceedings of the 11th*  
523 *International Coral Reef Symposium*: 410-414.
